# Supplementary material for: PGC-1α supports glutamine metabolism in breast cancer
Source: PubMed Central journal article supplement (PMC4178216; doi:10.1186/2049-3002-1-22), 2013-12-05
Supplement: 2049-3002-1-22-S2.pdf [file 2049-3002-1-22-S2.pdf]

**Table S1:** GC/MS metabolites and fragments used for mass isotopomer distribution analysis

| Metabolite                    | Formula (M-57)                                                                | Quantifying ions | Qualifying ion | Typical Rt (min) |
|-------------------------------|-------------------------------------------------------------------------------|------------------|----------------|------------------|
| Myristic acid-D <sub>27</sub> | C <sub>16</sub> D <sub>27</sub> H <sub>6</sub> O <sub>2</sub> Si              | 312              | 132            | 17.936           |
| Citrate                       | C <sub>20</sub> H <sub>39</sub> O <sub>6</sub> Si <sub>3</sub>                | 459-465          | 431            | 22.366           |
| α-Ketoglutarate oxime         | C <sub>14</sub> H <sub>28</sub> N <sub>1</sub> O <sub>5</sub> Si <sub>2</sub> | 346-351          | 258            | 17.292           |
| Fumarate                      | C <sub>12</sub> H <sub>23</sub> O <sub>4</sub> Si <sub>2</sub>                | 287-291          | 329            | 15.178           |
| Malate                        | C <sub>18</sub> H <sub>39</sub> O <sub>5</sub> Si <sub>3</sub>                | 419-423          | 287            | 18.203           |
| Pyruvate oxime                | C <sub>6</sub> H <sub>12</sub> N <sub>1</sub> O <sub>3</sub> Si               | 174-177          | 115            | 8.941            |
| Lactate                       | C <sub>11</sub> H <sub>25</sub> O <sub>3</sub> Si <sub>2</sub>                | 261-264          | 233            | 11.733           |
