# Supplementary material for: PGC-1α supports glutamine metabolism in breast cancer
Source: PubMed Central journal article supplement (PMC4178216; doi:10.1186/2049-3002-1-22), 2013-12-05

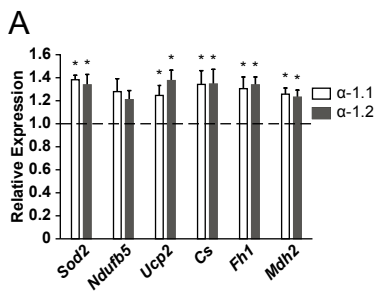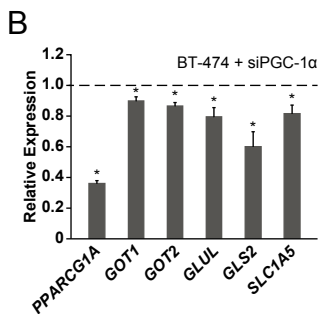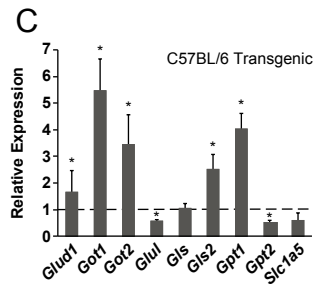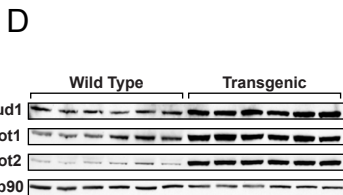

Supplement: 2049-3002-1-22-S3.pdf [file 2049-3002-1-22-S3.pdf]
